# Supplementary material
Source: Springer Nature journal article supplement (https://www.springermedizin.de/resource/supplementary/12889_2008_1576_MOESM2_ESM.pdf/9503468)
Supplement: MOESM2 [file 9503468]

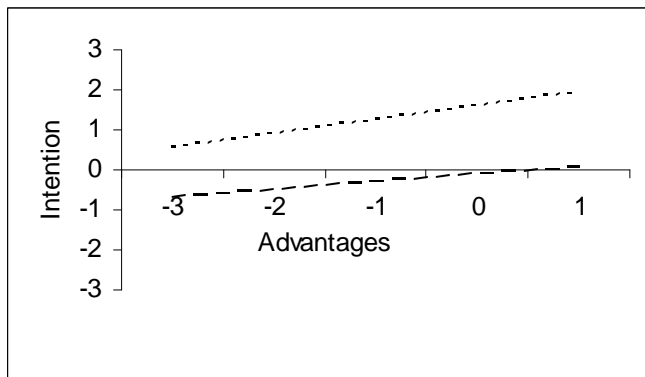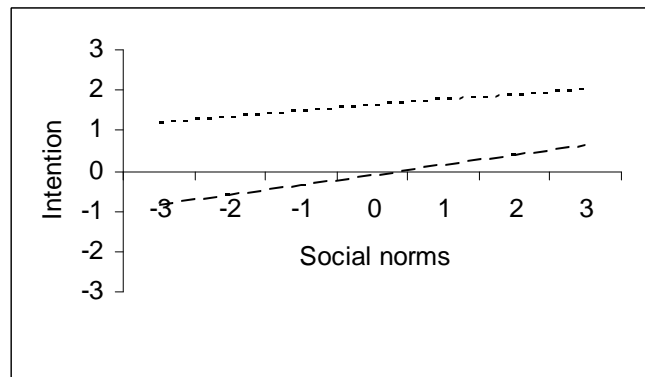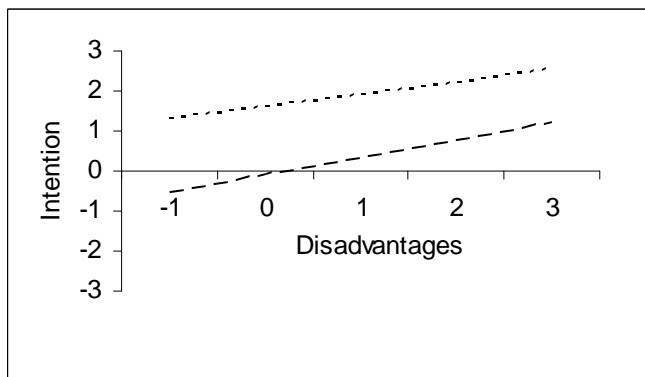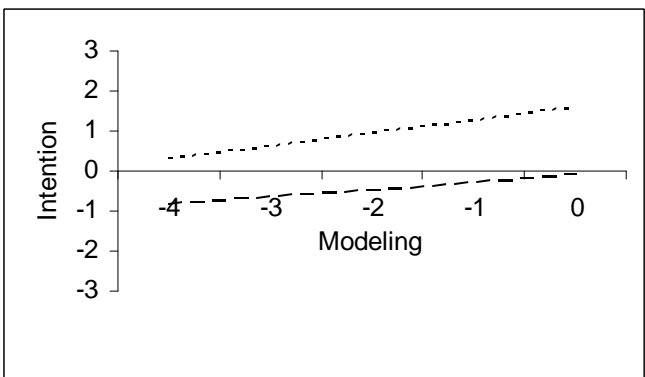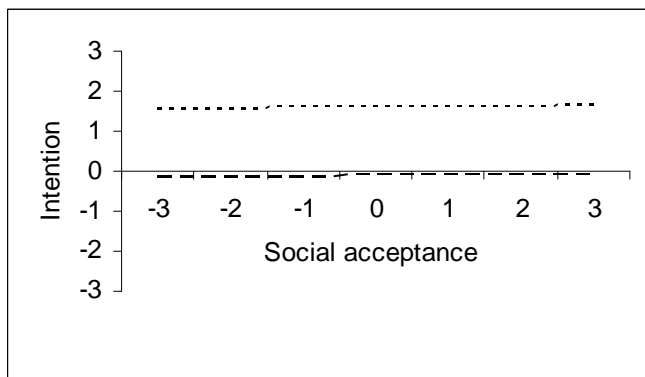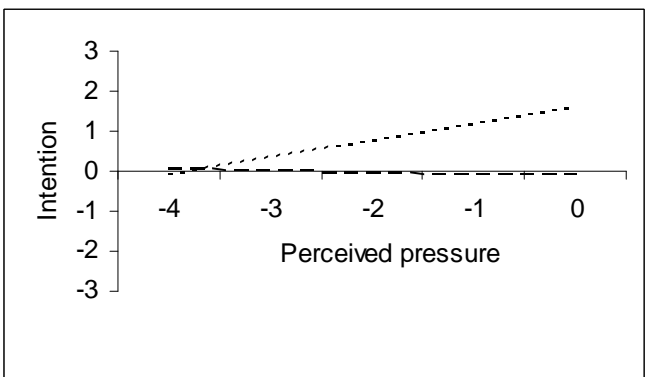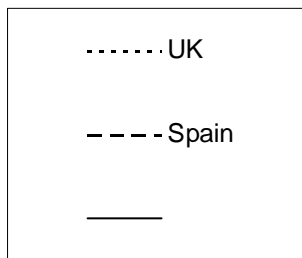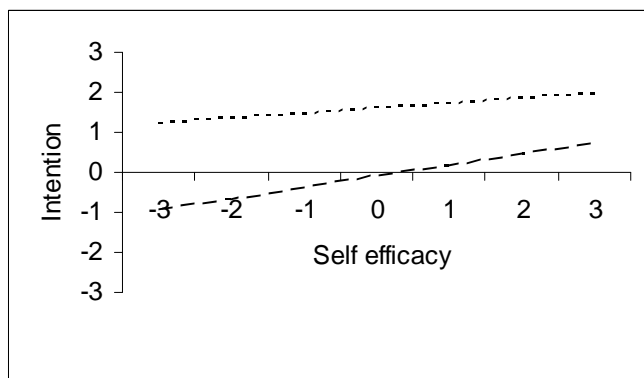

\*The predicted intention of 13 year old females in each country, though they would be similar for males and other ages.
